# Supplementary material
Source: publisher figshare collection journal article supplement (https://springernature.figshare.com/ndownloader/files/13317611)

**Figure S1**

Optical density (corresponding to cell density) plots after centrifugation of the *M. luteus* strains trpE16, ope and  $\Delta$ oleABCD in self-generated Percoll density gradients. The cells from cultures grown to the stationary phase were washed in 0.15 M NaCl and centrifuged for 30 min at 23 000 g and 20°C in Percoll with an initial density of 1.09 g  $\times$  ml<sup>-1</sup>. The centrifuge tubes were scanned and the images were analysed with ImageJ to produce the optical density plots.

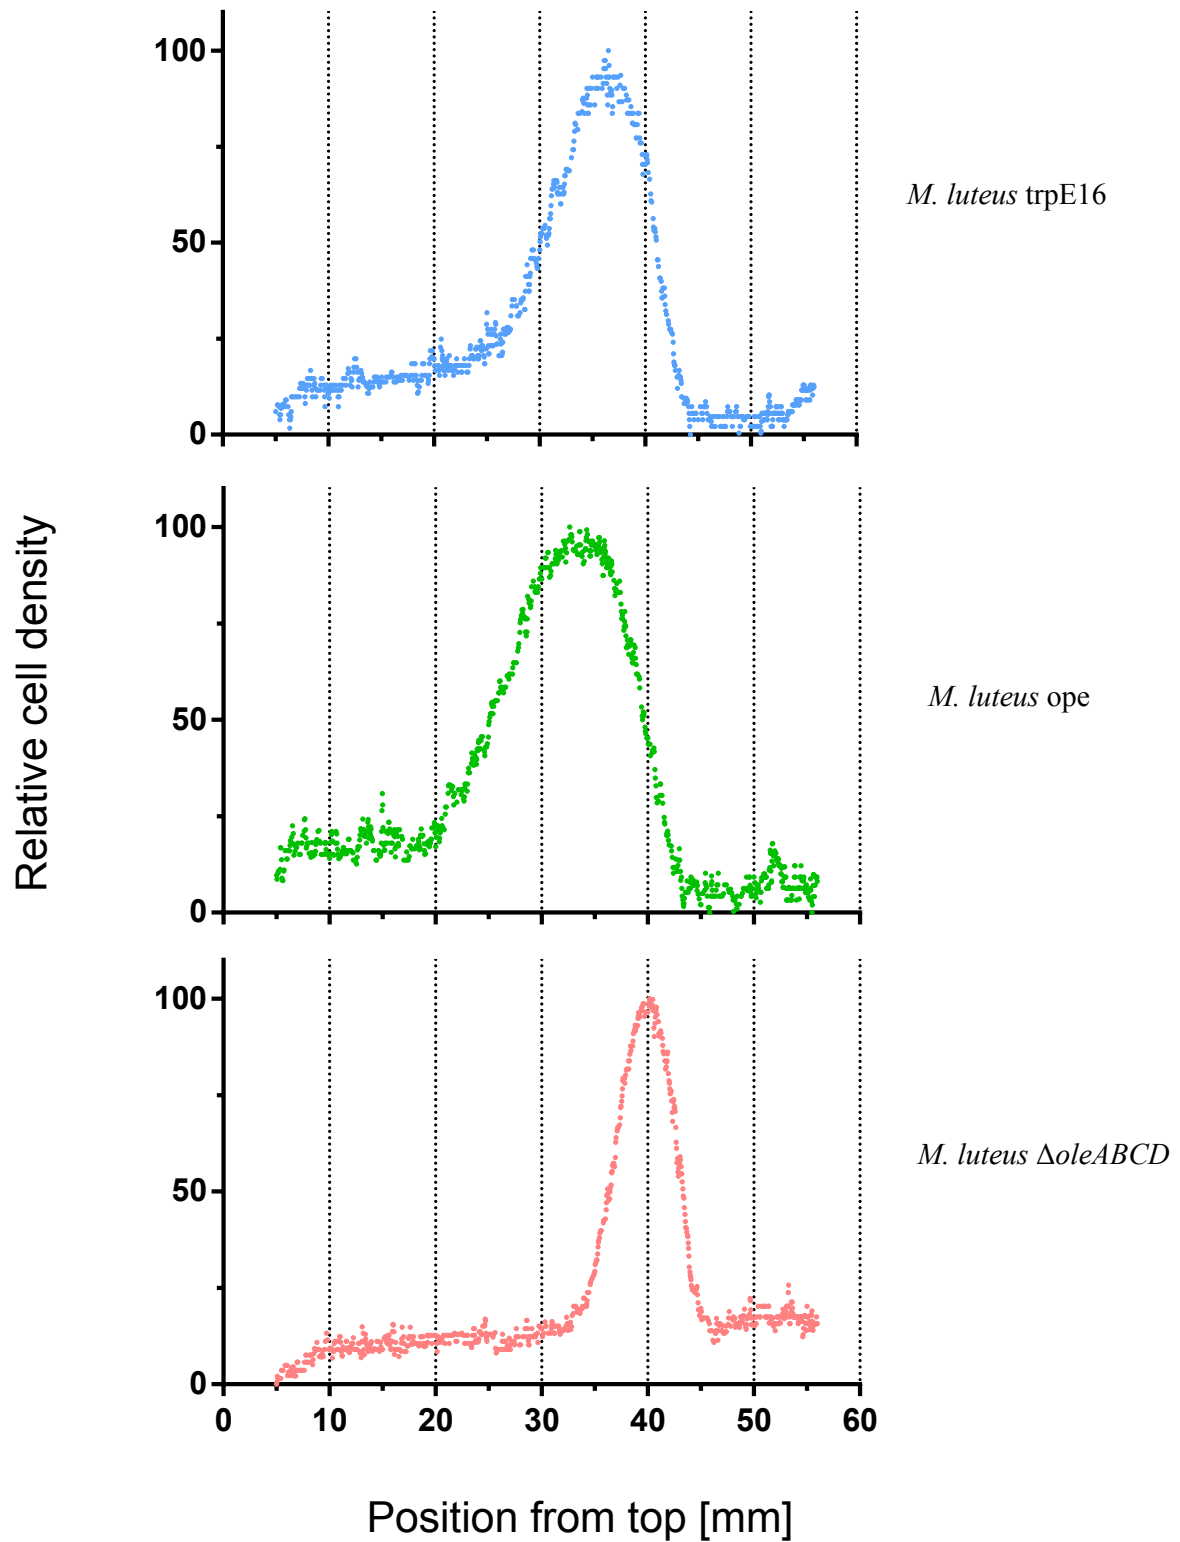

Supplement: Supplementary file [file 13317611]
